# Supplementary material for: β-Catenin/Smad3 Interaction Regulates Transforming Growth Factor-β-Induced Epithelial to Mesenchymal Transition in the Lens
Source: MDPI journal article supplement (doi:10.3390/ijms20092078), 2019-04-27
Supplement: s1 [file s1]

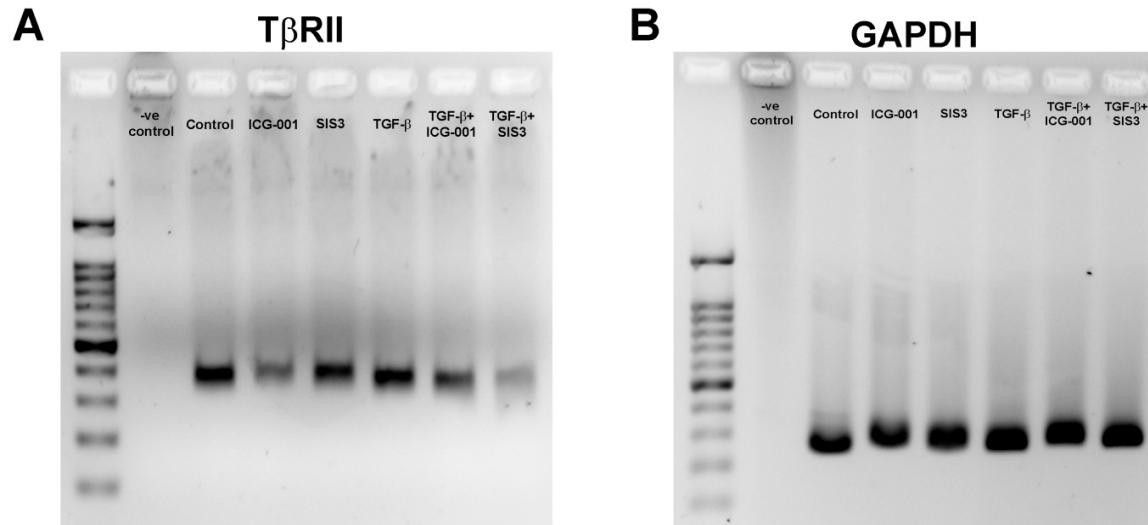

**Figure S1.** Gel images for Reverse Transcriptase (RT-PCR) for T $\beta$ RII and GAPDH. cDNA transcribed from RNA isolated from lens explants incubated with TGF- $\beta$  in the presence or absence of SIS3 or ICG-001 were amplified using PCR, then visualized on a 1.5% agarose gel by electrophoresis, using GAPDH as a standard control. The PCR sample without cDNA served as a negative control.
